# Supplementary material for: Wissenschaftskommunikation wissenschaftlich arbeitender Psycholog_innen im deutschsprachigen Raum
Source: Atypon-hosted journal article supplement (doi:10.1026/0033-3042/a000606), 2022-09-05
Supplement: 0033-3042_a000606_esm1.docx [file 0033-3042_a000606_esm1.docx]

## Elektronisches Supplement für

Wissenschaftskommunikation wissenschaftlich arbeitender Psycholog:_nnen im deutschsprachigen Raum

Eine Bestandsaufnahme

Oliver Genschow1, Melanie Sauerland2, Jan Crusius1 und Malte Friese3

1Universität zu Köln, Deutschland

2Maastricht University, Niederlande

3Universität des Saarlandes, Deutschland

Jun.-Prof. Dr. Oliver Genschow

Universität zu Köln

Social Cognition Center Cologne

Richard-Strauss Str. 2

50931 Köln

oliver.genschow@uni-koeln.de

**Tabelle E1.** Übersicht über Items Antworten zu den Formen von Wissenschaftskommunikation

| *Wie häufig haben Sie in den letzten 24 Monaten folgende Formen der Wissenschaftskommunikation betrieben?* (1 = *nie*; 2 = *1- bis 3-mal*; 3 = *4- bis 6-mal*; 4 = *mehr als 6-mal)* | *N* | 1-3 mal  (%) | 4-6 mal  (%) | > 6 mal (%) | Total (%) | Zusammen-hang mit Alter (*r*) |
| --- | --- | --- | --- | --- | --- | --- |
| Populärwissenschaftliche Vorträge gehalten | 740 | 37.4 | 6.6 | 3.2 | 47.2 | .33*** |
| Interviews gegeben (z. B. mit Radio, Fernsehen, o. ä.) | 740 | 29.3 | 9.1 | 8.5 | 46.9 | .38*** |
| Über soziale Medien kommuniziert (z. B. Facebook, Twitter, o. ä.) | 740 | 17.6 | 7.8 | 16.1 | 41.5 | -.05 |
| Populärwissenschaftliche Artikel selber verfasst | 740 | 30.1 | 3.9 | 1.2 | 35.2 | .20*** |
| Pressemitteilungen verschickt | 740 | 27.4 | 5.0 | 1.5 | 33.9 | .26*** |
| Mit Schulen u/o Lehrer_innen zusammengearbeitet | 740 | 18.1 | 3.9 | 5.7 | 27.7 | .18*** |
| Firmen, politische Entscheidungsträger o. ä. beraten | 740 | 16.2 | 4.3 | 4.7 | 25.2 | .25*** |
| Institutsführungen durchgeführt (z. B. Tag der offenen Tür, o. ä.) | 739 | 22.3 | 1.2 | 0.7 | 24.2 | .15*** |
| An öffentlicher Podiumsdiskussion teilgenommen | 740 | 18.8 | 2.6 | 0.7 | 22.1 | .34*** |
| Andere Form von Wissenschaftskommunikation betrieben | 740 | 10.3 | 3.5 | 4.5 | 18.3 | .17*** |
| Mit NGOs zusammengearbeitet | 740 | 8.6 | 2.2 | 1.6 | 12.4 | .27*** |
| Vorlesungen für Rentner_innen gehalten | 740 | 8.0 | 0.3 | 0.5 | 8.8 | .29*** |
| An Ausstellungsorganisation mitgewirkt (z. B. in Museen) | 740 | 8.1 | 0.0 | 0.1 | 8.2 | .13*** |
| Eigene Formate, wie z. B. Webblog oder Podcast, veröffentlicht | 740 | 4.9 | 0.9 | 1.8 | 7.6 | .02 |
| Populärwissenschaftliche Bücher verfasst | 740 | 6.8 | 0.3 | 0.3 | 7.4 | .20*** |
| Vorlesungen für Kinder gehalten | 740 | 6.2 | 0.5 | 0.1 | 6.8 | .09* |
| Webvideos erstellt | 740 | 1.1 | 1.4 | 1.6 | 4.1 | .13*** |
| An Science Slam teilgenommen | 740 | 3.1 | 0.4 | 0.1 | 3.6 | -.01 |

*Anmerkungen:* * *p* < .05; ** *p* < .01; *** *p* < .001

**Tabelle E2.** Gründe für Wissenschaftskommunikation

| *Falls Sie in den letzten 24 Monaten zumindest 1-mal Wissenschaftskommunikation betrieben haben, was waren die Gründe?*  (1 = *überhaupt nicht*; 5 = *voll und ganz)* | *N* | *M* | *SD* | Zusammenhang mit Alter (*r*) |
| --- | --- | --- | --- | --- |
| Durch Wissenschaftskommunikation erreiche ich mehr Leute | 623 | 4.07 | 0.98 | -.10* |
| Steuerzahler_innen haben ein Anrecht zu erfahren, was mit ihren Steuergeldern passiert | 623 | 3.73 | 1.23 | .11** |
| Wissenschaftskommunikation macht Spaß | 626 | 3.66 | 1.05 | -.02 |
| Ich spüre eine (moralische) Verpflichtung Wissenschaftskommunikation zu betreiben | 624 | 3.66 | 1.16 | .10* |
| Wissenschaftskommunikation steigert den Bekanntheitsgrad | 624 | 3.57 | 1.17 | -.01 |
| Wissenschaftskommunikation fördert mein eigenes Verständnis meines Forschungsgebiets | 624 | 3.49 | 1.17 | -.06 |
| Wissenschaftskommunikation führt zu Einladungen zu (öffentlichen) Vorträgen und Podiumsdiskussionen | 613 | 2.93 | 1.27 | .02 |
| Wissenschaftskommunikation erhöht meine Chancen auf dem Jobmarkt | 617 | 2.44 | 1.25 | -.31*** |
| Wissenschaftskommunikation ist wichtig für die Evaluation (z. B. durch Gutachter_innen, Vorgesetzte, Arbeitgeber, Förderinstitute, o. ä.) meiner Arbeit | 618 | 2.43 | 1.27 | -.05 |
| Wissenschaftskommunikation bringt zusätzliche Zitierungen | 618 | 2.14 | 1.09 | -.13* |
| Andere Gründe | 377 | 2.04 | 1.39 | .03 |

*Anmerkungen:* * *p* < .05; ** *p* < .01; *** *p* < .001

**Tabelle E3.** Barrieren für Wissenschaftskommunikation

| *Was sind Gründe, die Sie daran hindern mehr Wissenschaftskommunikation zu betreiben? (*1 = *überhaupt nicht*; 5 = *voll und ganz)* | *N* | *M* | *SD* | Zusammenhang mit Alter (*r*) |
| --- | --- | --- | --- | --- |
| Ich habe zu wenig Zeit für Wissenschaftskommunikation | 694 | 3.80 | 1.12 | -.09* |
| Andere Dinge sind einfach wichtiger für mein Fortkommen | 689 | 3.57 | 1.27 | -.23*** |
| Ich bin nicht gut genug für Wissenschaftskommunikation ausgebildet | 693 | 3.24 | 1.24 | -.27*** |
| Es fehlt mir an (institutioneller) Unterstützung für die Durchführung, Organisation und Verbreitung von Wissenschaftskommunikation (z. B. Hilfe beim Verfassen von Pressemitteilungen, Korrekturlesen, o. ä.) | 692 | 3.11 | 1.30 | -.18*** |
| Das Verhältnis von Aufwand und Ertrag stimmt für mich nicht bei Wissenschaftskommunikation | 689 | 2.96 | 1.22 | -.08* |
| Mir fehlen die finanziellen Mittel, um Wissenschaftskommunikation zu betreiben | 693 | 2.94 | 1.31 | -.16*** |
| Meine Fähigkeiten, Wissenschaftskommunikation zu betreiben, sind begrenzt | 693 | 2.84 | 1.17 | -.13** |
| Ich bin besorgt, dass Wissenschaftskommunikation negative Effekte darauf haben könnte, wie ich als Wissenschaftler_in wahrgenommen werde (z. B. meine Seriosität; Erfolg) | 693 | 2.50 | 1.33 | -.10* |
| Ich befürchte, dass die Öffentlichkeit auf mehr oder weniger feindselige Art und Weise auf meine Wissenschaftskommunikation reagieren könnte | 694 | 2.21 | 1.24 | -.11** |
| Wissenschaftskommunikation bringt mir nichts | 694 | 2.04 | 1.15 | -.03 |
| Wissenschaftskommunikation macht mir keinen Spaß | 690 | 1.88 | 1.09 | -.01 |
| Ich habe geringes Interesse an Wissenschaftskommunikation | 694 | 1.87 | 1.08 | .04 |
| Mein Forschungsgebiet eignet sich nicht für Wissenschaftskommunikation | 694 | 1.83 | 1.17 | -.06 |
| Andere Gründe | 582 | 1.81 | 1.28 | -.03 |
| Ich bin besorgt, dass Rezipient_innen meiner Wissenschaftskommunikation persönliche, familiäre, o. a. Probleme mit mir besprechen oder diskutieren möchten | 690 | 1.68 | 0.99 | -.04 |

*Anmerkungen:* * *p* < .05; ** *p* < .01; *** *p* < .001

| **Tabelle E4.** Fördermöglichkeiten und Anreize |  |  |  |  |
| --- | --- | --- | --- | --- |
| *Was würde Sie veranlassen, Wissenschaftskommunikation häufiger zu betreiben?* (1 = *überhaupt nicht*; 5 = *sehr stark)* | *N* | *M* | *SD* | Zusammenhang mit Karrierestufe  (*r*, *n* = 626-629) |
| Entlastung bei institutionellen Verpflichtungen (z. B. geringeres Lehrdeputat, weniger Gremienarbeit, o. ä.) | 686 | 3.95 | 1.23 | -.11** |
| Zusätzliche institutionelle Unterstützung bei der Durchführung, Organisation und Verbreitung von Wissenschaftskommunikation (z. B. Hilfe beim Verfassen von Pressemitteilungen, Korrekturlesen, o. ä.) | 687 | 3.72 | 1.21 | -.14*** |
| Fördergelder für das Betreiben von Wissenschaftskommunikation | 688 | 3.66 | 1.30 | -.17*** |
| Gleiche Gewichtung von Wissenschaftskommunikation und Publikationen in Fachzeitschriften (z. B. bei der Evaluation des Lebenslaufes) | 686 | 3.56 | 1.38 | -.28*** |
| Bonuszahlungen Ihres Arbeitgebers (z. B. Universität) | 687 | 3.55 | 1.33 | -.27*** |
| Wissenschaftskommunikation als ein zentrales Kriterium bei der Bewilligung von Forschungsanträgen (Drittmittelanträgen) | 685 | 3.45 | 1.38 | -.21*** |
| Wissenschaftskommunikation als Kriterium für Beförderung und Evaluation (z. B. als Teil eines Tenure-Track-Verfahrens) | 687 | 3.43 | 1.43 | -.27*** |
| Teilnahme an Ausbildung/Trainings/Workshops o. ä. zu Wissenschaftskommunikation | 687 | 3.40 | 1.32 | -.35*** |
| Wissenschaftskommunikation als ein zentrales Kriterium bei Berufungsverfahren (z. B. durch Erwähnung in Ausschreibungstexten) | 686 | 3.38 | 1.38 | -.23*** |
| Klare Stellungnahme von Fachorganisationen, dass Wissenschaftskommunikation gewünscht ist | 687 | 3.27 | 1.44 | -.24*** |
| Preise (Auszeichnungen) für Wissenschaftskommunikation | 687 | 2.44 | 1.30 | -.22*** |

*Anmerkungen:* * *p* < .05; ** *p* < .01; *** *p* < .001
